# Supplementary material
Source: publisher site journal article supplement (https://www.dovepress.com/article/460954)
Supplement: Supplementary file 1 [file get_supplementary_file.php]

TTGGCGAGCCACTGGTGCTGAAGTGTAAGGGGGCCCCCAAGAAACCACCC  
CAGCGGCTGGAATGGAACTGAACACAGGCCGGACAGAAGCTTGGAAGG  
TCCTGTCTCCCCAGGGAGGAGGCCCTGGGACAGTGTGGCTCGTGTCTTC  
CCAACGGCTCCCTCTTCCTCCGGCTGTCGGGATCCAGGATGAGGGGATTT  
TCCGGTGCCAGGCAATGAACAGGAATGGAAAGGAGACCAAGTCCAACACTAC  
CGAGTCCGTGTCTACCAGATTCCTGGGAAGCCAGAAATTGTAGATTCTGCC  
TCTGAACTCACGGCTGGTGTTCCTCAATAAGGTGGGGACATGTGTGTCAGAG  
GGAAGCTACCCTGCAGGGACTCTTAGCTGGCACTTGGATGGGAAGCCCCT  
GGTGCCTAATGAGAAGGGAGTATCTGTGAAGGAACAGACCAGGAGACACC  
CTGAGACAGGGCTCTTCACACTGCAGTCGGAGCTAATGGTGACCCCAGCC  
CGGGGAGGAGATCCCCGTCCCACCTTCTCCTGTAGCTTCAGCCCAGGCCTT  
CCCCGACACCGGGCCTTGCGCACAGCCCCATCCAGCCCCGTGTCTGGGA  
GCCTGTGCCTCTGGAGGAGGTCCAATTGGTGGTGGAGCCAGAAGGTGGAG  
CAGTAGCTCCTGGTGGAAACCGTAACCCTGACCTGTGAAGTCCCTGCCCAGC  
CCTCTCCTCAAATCCACTGGATGAAGGATGGTGTGCCCTTGCCCCTTCCCC  
CCAGCCCTGTGCTGATCCTCCCTGAGATAGGGCCTCAGGACCAGGGAACT  
ACAGCTGTGTGGCCACCCATTCCAGCCACGGGCCCCAGGAAAGCCGTGCT  
GTCAGCATCAGCATCATCGAACCAGGCGAGGAGGGGCCAACTGCAGGCTC  
TGTGGGAGGATCAGGGCTGGGAACTCTAGCCCTGGCCCTGGGGATCCTGG  
GAGGCCTGGGGACAGCCGCCCTGCTCATTGGGGTCATCTTGTGGCAAAGG  
CGGCAACGCCGAGGAGAGGAGAGGAAGGCCCCAGAAAACCAGGAGGAA  
GAGGAGGAGCGTGCAGAACTGAATCAGTCGGAGGAACCTGAGGCAGGCG

AGAGTAGTACTGGAGGGCCTTGACTCGAG

Vector atlas:

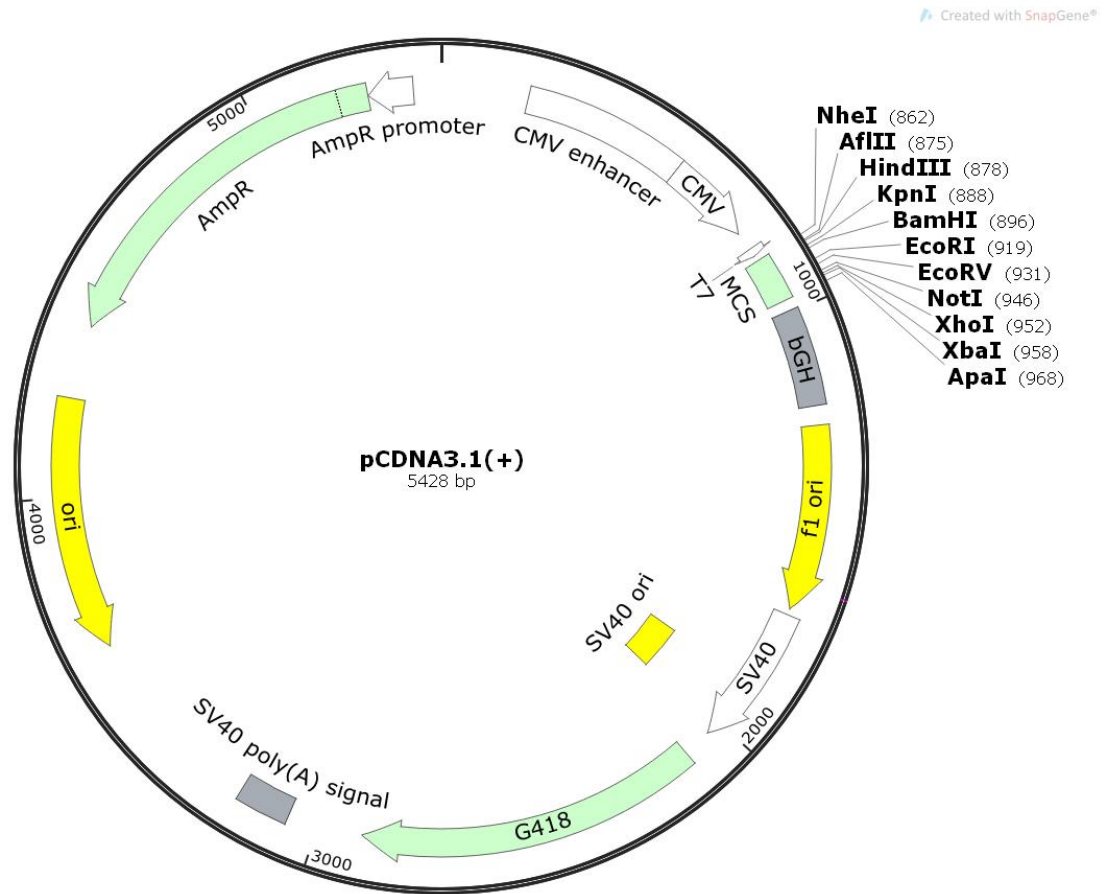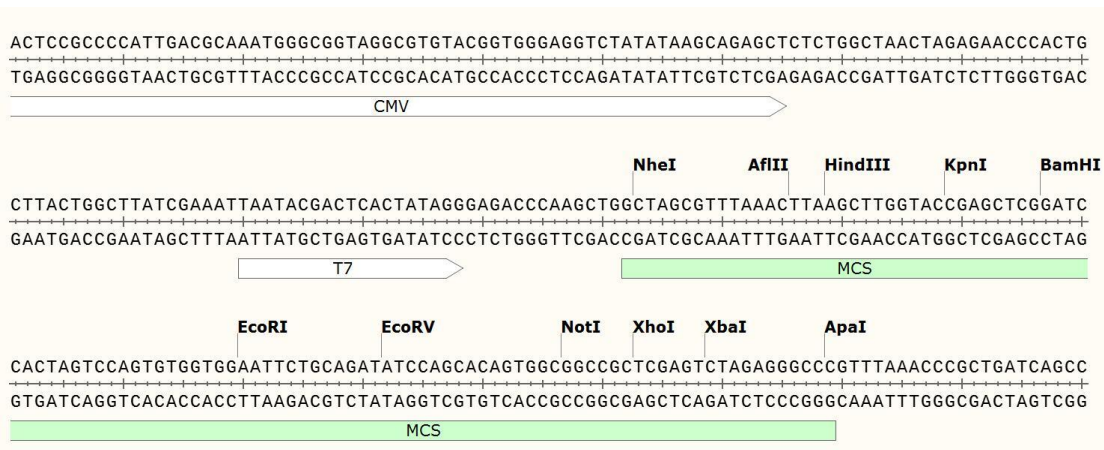

Figure S1. Vector atlas.

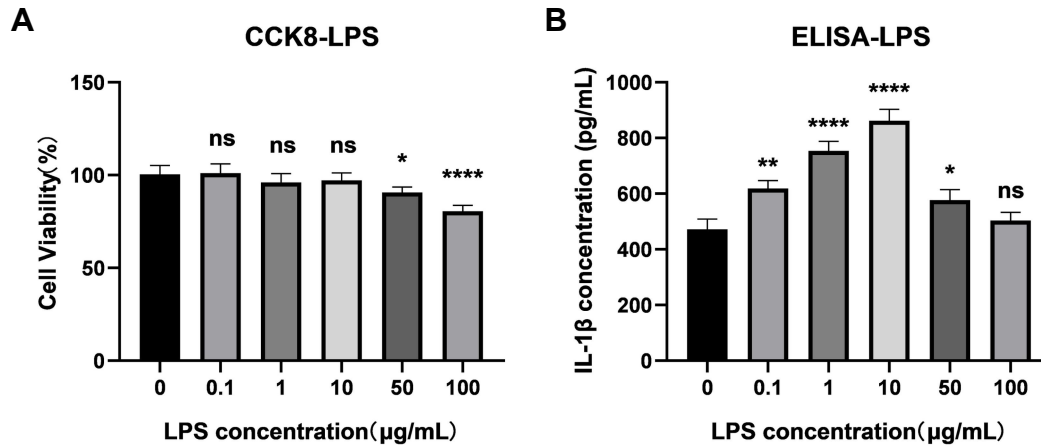

Figure S2. LPS concentration screening. (A) The effect of different concentrations of LPS on the proliferation of hPDLC was detected by CCK-8. (B) The effect of different concentrations of LPS on the release of inflammatory factor IL1β from HPDLC was detected by ELISA. Data were presented as mean ± SD. \* $p < 0.05$ , \*\* $p < 0.01$ , \*\*\*\* $p < 0.0001$  vs control group. “ns” represents no statistically significant difference vs control group with  $p > 0.05$ .

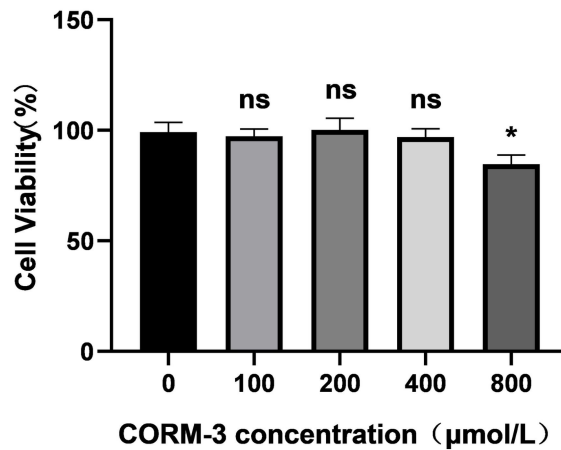

Figure S3. Toxicity detection of hPDLC by CORM-3. The effect of different concentrations of CORM-3 on the proliferation of hPDLC was detected by CCK-8. Data were presented as mean ± SD. \* $p < 0.05$  vs control group. “ns” represents no statistically significant difference vs control group with  $p > 0.05$ .

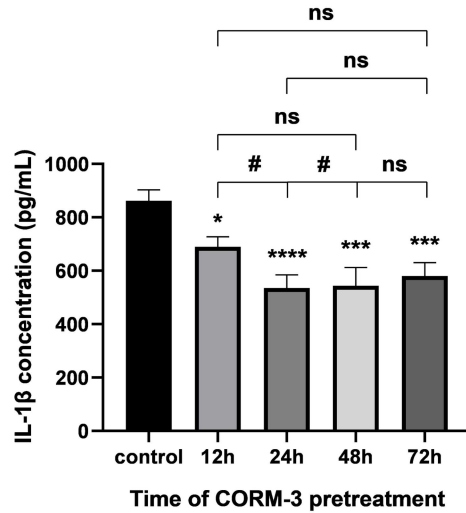

Figure S4. Time selection for CORM-3 pretreatment. The effect of different CORM-3 pretreatment time on the release of inflammatory cytokine IL1β in hPDLC was detected by ELISA. Data were presented as mean ± SD. # $p < 0.05$  vs experimental groups; \* $p < 0.05$ , \*\* $p < 0.001$ , \*\*\*\* $p < 0.0001$  vs control group. “ns” represents no statistically significant difference vs control group and experimental groups with  $p > 0.05$ .

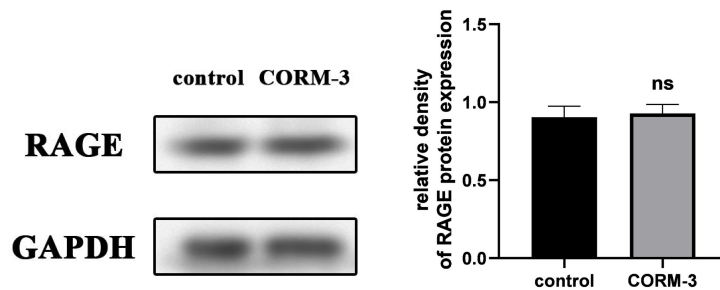

Figure S5. The effect of CORM-3 on RAGE expression. hPDLCs were divided into 2 groups, including control group (untreated) and CORM-3 group (only treated with CORM-3). The effect of CORM-3 on RAGE expression was detected by Western Blot. Data were presented as mean ± SD. “ns” represents no statistically significant difference vs control group with  $p > 0.05$ .

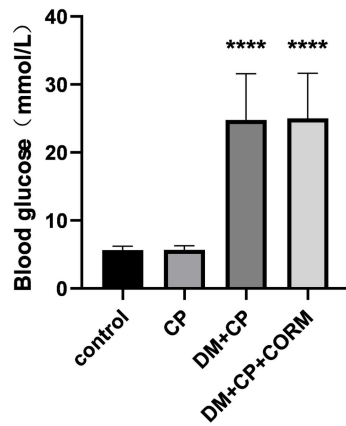

Figure S6. Establishment of diabetes rat model. The experimental diabetes rat model was established by STZ injection. After the modeling was completed, those random blood glucose was detected to verify the success of the modeling. Data were presented as mean  $\pm$  SD. \*\*\*\*  $p < 0.0001$  vs control group.

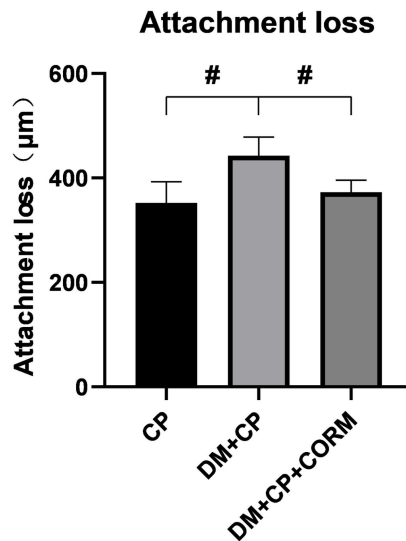

Figure S7. Establishment of experimental periodontitis rat model. The experimental periodontitis rat model was established by ligation and *P.g* coating. Attachment loss measured through HE slices. Data were presented as mean  $\pm$  SD. #  $p < 0.05$  vs experimental groups.
